# Supplementary material for: MicroRNA-326 attenuates immune escape and prevents metastasis in lung adenocarcinoma by targeting PD-L1 and B7-H3
Source: PubMed Central journal article supplement (PMC8206349; doi:10.1038/s41420-021-00527-8), 2021-06-15
Supplement: 41420_2021_527_MOESM3_ESM.pdf [file 41420_2021_527_MOESM3_ESM.pdf]

**Important information. Please read.**

- This form should be used by authors to request any change in authorship (adding/deleting authors) including changes in corresponding authors. This form should not be used for name changes. Please fully complete all sections. Use black ink and block capitals and provide each author's full name with the given name first followed by the family name.
- By signing this declaration, all authors guarantee that the order of the authors are in accordance with their scientific contribution, if applicable as different conventions apply per discipline, and that only authors have been added who made a meaningful contribution to the work.
- Please note, in author collaborations where there is formal agreement for representing the collaboration, it is sufficient for the representative or legal guarantor (usually the corresponding author) to complete and sign the Authorship Change Form on behalf of all authors, **next to the added/removed author(s)**. (Complete Section 3, followed by Section 6.)  
In author collaborations where there is no formal agreement for representing the collaboration and **there are more than 10 authors**, one may sign for all, provided the signer appends correspondence that attests that each of the authors have agreed to the change **and the added/removed authors sign the form**. (Complete Section 3, followed by Section 6.)
- Please note, we cannot investigate or mediate any authorship disputes. If you are unable to obtain agreement from all authors (including those who you wish to be removed) you must refer the matter to your institution(s) for investigation. Please inform us if you need to do this.
- If you are not able to return a fully completed form within **30 days** of the date that it was sent to the author requesting the change, we may have to withdraw your manuscript. We cannot publish manuscripts where authorship has not been agreed by all authors (including those who have been removed).
- Incomplete forms will be rejected.
- Please return/upload this form, fully completed, to the Journals Editorial Office. The Journal and/or Publisher will consider the information you have provided to decide whether to approve the proposed change in authorship. We may decide to contact your institution for more information or undertake a further investigation, if appropriate, before making a final decision.

Section 1: Please provide the current title of manuscript

Manuscript ID no.:CDDISCOVERY-21-1410R

Title: MicroRNA-326 attenuates immune escape and prevents metastasis in lung adenocarcinoma by targeting PD-L1 and B7-H3

Section 2: Please provide the previous authorship, in the order shown on the manuscript before the changes were introduced. Please indicate the corresponding author by adding (CA) behind the name.

|                         | First name(s) | Family name | ORCID or SCOPUS id, if available |
|-------------------------|---------------|-------------|----------------------------------|
| 1 <sup>st</sup> author  | Lijuan        | Shao        |                                  |
| 2 <sup>nd</sup> author  | Qian          | He          |                                  |
| 3 <sup>rd</sup> author  | Jingbo        | Wang        |                                  |
| 4 <sup>th</sup> author  | Shengcheng    | Lin         |                                  |
| 5 <sup>th</sup> author  | Liuqing       | Wu          |                                  |
| 6 <sup>th</sup> author  | Yubiao        | Gao         |                                  |
| 7 <sup>th</sup> author  | Wei           | Ma          |                                  |
| 8 <sup>th</sup> author  | Jun           | Dong        |                                  |
| 9 <sup>th</sup> author  | Xiaofei       | Yang        |                                  |
| 10 <sup>th</sup> author | Furong        | Li          |                                  |

Please use an additional sheet if there are more than 10 authors.

Section 3: Please provide a justification for change. Please use this section to explain your reasons for changing the authorship of your manuscript, e.g. what necessitated the change in authorship? Please refer to the (journal) policy pages for more information about authorship. Please explain why omitted authors were not originally included and/or why authors were removed on the submitted manuscript.

In the process of revising the paper, Dr. Fei He performed animal experiments and flow cytometry analysis, which contributed to the revision of the paper.

Section 4: Proposed new authorship. Please provide your new authorship list in the order you would like it to appear on the manuscript. Please indicate the corresponding author by adding (CA) behind the name. If the Corresponding Author has changed, please indicate the reason under section 3.

|                         | First name(s) | Family name (this name will appear in full on the final publication and will be searchable in various abstract and indexing databases) | Affiliated institute                                                 | E-mail address           |
|-------------------------|---------------|----------------------------------------------------------------------------------------------------------------------------------------|----------------------------------------------------------------------|--------------------------|
| 1 <sup>st</sup> author  | Lijuan        | Shao                                                                                                                                   | Shenzhen People's Hospital                                           | shaoshao12071@163.com    |
| 2 <sup>nd</sup> author  | Qian          | He                                                                                                                                     | Shenzhen People's Hospital                                           | angus1216@163.com        |
| 3 <sup>rd</sup> author  | Jingbo        | Wang                                                                                                                                   | Shenzhen People's Hospital                                           | wangjingboqd2008@163.com |
| 4 <sup>th</sup> author  | Fei           | He                                                                                                                                     | Shenzhen People's Hospital                                           | hf_xmu@163.com           |
| 5 <sup>th</sup> author  | Shengcheng    | Lin                                                                                                                                    | Chinese Academy of Medical Sciences and PeKing Union Medical College | sirius_hzoo@163.com      |
| 6 <sup>th</sup> author  | Liuqing       | Wu                                                                                                                                     | Shenzhen People's Hospital                                           | 408211372@qq.com         |
| 7 <sup>th</sup> author  | Yubiao        | Gao                                                                                                                                    | Shenzhen People's Hospital                                           | 2445602039@qq.com        |
| 8 <sup>th</sup> author  | Wei           | Ma                                                                                                                                     | Shenzhen People's Hospital                                           | 364085817@qq.com         |
| 9 <sup>th</sup> author  | Jun           | Dong                                                                                                                                   | Jinan University                                                     | dongjunbox@163.com       |
| 10 <sup>th</sup> author | Xiaofei       | Yang                                                                                                                                   | Shenzhen People's Hospital                                           | sophiayangxf@163.com     |

Please use an additional sheet if there are more than 10 authors.



Section 5: Author contribution, Acknowledgement and Disclosures. Please use this section to provide a new disclosure statement and, if appropriate, acknowledge any contributors who have been removed as authors and ensure you state what contribution any new authors made (if applicable per the journal or book (series) policy). Please ensure these are updated in your manuscript - [after approval of the change\(s\)](#) - as our production department will not transfer the information in this form to your manuscript.

**New acknowledgements:**

The study was supported by the Science and Technology Project of Shenzhen (No. GJHZ20170310090257380, JCYJ20170413092711058, JCYJ20180228164407689), the Natural Science Foundation of Guangdong Province, China (Grant No. 2018A0303100019), the China Postdoctoral Science Foundation (No. 2018M631046).

**New Disclosures (financial and non-financial interests, funding):**

The authors declare that they have no conflict of interest.

**New Author Contributions statement (if applicable per the journal policy):**

Lijuan Shao designed the research and finished of the article. Qian He designed the research and interpreted part of the data. Jingbo Wang interpreted the data. Fei He performed animal experiments and flow cytometry analysis. Shengcheng Lin collected pathological tissues and analysed the clinical data. Lujing Wu and Yubiao Gao performed part of the in vitro experiments. Wei Ma performed part of the in vivo experiments. Jun Dong pervaded the technical support. Xiaofei Yang and Furong Li supervised the project.

State 'Not applicable' if there are no new authors.

**Section 6: Declaration of agreement. All authors, unchanged, new and removed must sign this declaration.**

(NB. Please print the form, (docu-)sign and return/upload a scanned copy. Please note that signatures that have been inserted as an image file are acceptable as long as it is handwritten. Typed names in the signature box are unacceptable.) \* Please delete as appropriate. Delete all of the bold if you were on the original authorship list and are remaining as an author.

|                         | First name | Family name |                                                                                                                                                                                | Signature      | Date     |
|-------------------------|------------|-------------|--------------------------------------------------------------------------------------------------------------------------------------------------------------------------------|----------------|----------|
| 1 <sup>st</sup> author  | Lijuan     | Shao        | I agree to the proposed new authorship shown in section 4 /and the proposed change in corresponding author                                                                     | Lijuan Shao    | 2021.5.4 |
| 2 <sup>nd</sup> author  | Qian       | He          | I agree to the proposed new authorship shown in section 4 /and the proposed change in corresponding author                                                                     | Qian He        | 2021.5.4 |
| 3 <sup>rd</sup> author  | Jingbo     | Wang        | I agree to the proposed new authorship shown in section 4 /and the proposed change in corresponding author                                                                     | Jingbo Wang    | 2021.5.4 |
| 4 <sup>th</sup> authors | Fei        | He          | I agree to the proposed new authorship shown in section 4 /and the <b>addition/removal* of my name to the authorship list</b> /and the proposed change in corresponding author | Fei He         | 2021.5.4 |
| 5 <sup>th</sup> author  | Shengcheng | Lin         | I agree to the proposed new authorship shown in section 4 /and the proposed change in corresponding author                                                                     | Linsheng cheng | 2021.5.4 |
| 6 <sup>th</sup> author  | Liu jing   | Wu          | I agree to the proposed new authorship shown in section 4 /and the proposed change in corresponding author                                                                     | Liu jing Wu    | 2021.5.4 |
| 7 <sup>th</sup> author  | Yubiao     | Gao         | I agree to the proposed new authorship shown in section 4 /and the proposed change in corresponding author                                                                     | Yubiao Gao     | 2021.5.4 |

|                         | First name | Family name |                                                                                                            | Signature           | Date     |
|-------------------------|------------|-------------|------------------------------------------------------------------------------------------------------------|---------------------|----------|
| 8 <sup>th</sup> author  | Wei        | Ma          | I agree to the proposed new authorship shown in section 4 /and the proposed change in corresponding author | <i>Wei Ma</i>       | 2021.5.4 |
| 9 <sup>th</sup> author  | Jun        | Dong        | I agree to the proposed new authorship shown in section 4 /and the proposed change in corresponding author | <i>Jun Dong</i>     | 2021.5.4 |
| 10 <sup>th</sup> author | Xiaofei    | Yang        | I agree to the proposed new authorship shown in section 4 /and the proposed change in corresponding author | <i>Yang Xiaofei</i> | 2021.5.4 |

Please use an additional sheet if there are more than 10 authors.

**In case of author collaborations with formal agreement:**

|                                | Name of consortium/consortia | First name | Family name |                                                                                                            | Signature      | Date |
|--------------------------------|------------------------------|------------|-------------|------------------------------------------------------------------------------------------------------------|----------------|------|
| Representative/legal guarantor | Not applicable               |            |             | I agree to the proposed new authorship shown in section 4 /and the proposed change in corresponding author | Not applicable |      |

Both added/removed authors should complete the information in the first table under Section 6.

---- End of form ----



**Important information. Please read.**

- This form should be used by authors to request any change in authorship (adding/deleting authors) including changes in corresponding authors. This form should not be used for name changes. Please fully complete all sections. Use black ink and block capitals and provide each author's full name with the given name first followed by the family name.
- By signing this declaration, all authors guarantee that the order of the authors are in accordance with their scientific contribution, if applicable as different conventions apply per discipline, and that only authors have been added who made a meaningful contribution to the work.
- Please note, in author collaborations where there is formal agreement for representing the collaboration, it is sufficient for the representative or legal guarantor (usually the corresponding author) to complete and sign the Authorship Change Form on behalf of all authors, **next to the added/removed author(s)**. (Complete Section 3, followed by Section 6.)  
In author collaborations where there is no formal agreement for representing the collaboration and **there are more than 10 authors**, one may sign for all, provided the signer appends correspondence that attests that each of the authors have agreed to the change **and the added/removed authors sign the form**. (Complete Section 3, followed by Section 6.)
- Please note, we cannot investigate or mediate any authorship disputes. If you are unable to obtain agreement from all authors (including those who you wish to be removed) you must refer the matter to your institution(s) for investigation. Please inform us if you need to do this.
- If you are not able to return a fully completed form within **30 days** of the date that it was sent to the author requesting the change, we may have to withdraw your manuscript. We cannot publish manuscripts where authorship has not been agreed by all authors (including those who have been removed).
- Incomplete forms will be rejected.
- Please return/upload this form, fully completed, to the Journals Editorial Office. The Journal and/or Publisher will consider the information you have provided to decide whether to approve the proposed change in authorship. We may decide to contact your institution for more information or undertake a further investigation, if appropriate, before making a final decision.

Section 1: Please provide the current title of manuscript

Manuscript ID no.:CDDISCOVERY-21-1410R

Title: MicroRNA-326 attenuates immune escape and prevents metastasis in lung adenocarcinoma by targeting PD-L1 and B7-H3

Section 2: Please provide the previous authorship, in the order shown on the manuscript before the changes were introduced. Please indicate the corresponding author by adding (CA) behind the name.

|                         | First name(s) | Family name | ORCID or SCOPUS id, if available |
|-------------------------|---------------|-------------|----------------------------------|
| 1 <sup>st</sup> author  | Lijuan        | Shao        |                                  |
| 2 <sup>nd</sup> author  | Qian          | He          |                                  |
| 3 <sup>rd</sup> author  | Jingbo        | Wang        |                                  |
| 4 <sup>th</sup> author  | Shengcheng    | Lin         |                                  |
| 5 <sup>th</sup> author  | Liujing       | Wu          |                                  |
| 6 <sup>th</sup> author  | Yubiao        | Gao         |                                  |
| 7 <sup>th</sup> author  | Wei           | Ma          |                                  |
| 8 <sup>th</sup> author  | Jun           | Dong        |                                  |
| 9 <sup>th</sup> author  | Xiaofei       | Yang        |                                  |
| 10 <sup>th</sup> author | Furong        | Li          |                                  |

Please use an additional sheet if there are more than 10 authors.



Section 3: Please provide a justification for change. Please use this section to explain your reasons for changing the authorship of your manuscript, e.g. what necessitated the change in authorship? Please refer to the (journal) policy pages for more information about authorship. Please explain why omitted authors were not originally included and/or why authors were removed on the submitted manuscript.

In the process of revising the paper, Dr. Fei He performed animal experiments and flow cytometry analysis, which contributed to the revision of the paper.

Section 4: Proposed new authorship. Please provide your new authorship list in the order you would like it to appear on the manuscript. Please indicate the corresponding author by adding (CA) behind the name. If the Corresponding Author has changed, please indicate the reason under section 3.

|                         | First name(s) | Family name (this name will appear in full on the final publication and will be searchable in various abstract and indexing databases) | Affiliated institute       | E-mail address |
|-------------------------|---------------|----------------------------------------------------------------------------------------------------------------------------------------|----------------------------|----------------|
| 11 <sup>th</sup> author | Furong        | Li (CA)                                                                                                                                | Shenzhen People's Hospital | frli62@163.com |
|                         |               |                                                                                                                                        |                            |                |
|                         |               |                                                                                                                                        |                            |                |
|                         |               |                                                                                                                                        |                            |                |
|                         |               |                                                                                                                                        |                            |                |
|                         |               |                                                                                                                                        |                            |                |
|                         |               |                                                                                                                                        |                            |                |
|                         |               |                                                                                                                                        |                            |                |
|                         |               |                                                                                                                                        |                            |                |

Please use an additional sheet if there are more than 10 authors.

**Section 5: Author contribution, Acknowledgement and Disclosures.** Please use this section to provide a new disclosure statement and, if appropriate, acknowledge any contributors who have been removed as authors and ensure you state what contribution any new authors made (if applicable per the journal or book (series) policy). Please ensure these are updated in your manuscript - after approval of the change(s) - as our production department will not transfer the information in this form to your manuscript.

**New acknowledgements:**

The study was supported by the Science and Technology Project of Shenzhen (No. GJHZ20170310090257380, JCYJ20170413092711058, JCYJ20180228164407689), the Natural Science Foundation of Guangdong Province, China (Grant No. 2018A0303100019), the China Postdoctoral Science Foundation (No. 2018M631046)

**New Disclosures (financial and non-financial interests, funding):**

The authors declare that they have no conflict of interest.

**New Author Contributions statement (if applicable per the journal policy):**

Lijuan Shao designed the research and finished of the article. Qian He designed the research and interpreted part of the data. Jingbo Wang interpreted the data. Fei He performed animal experiments and flow cytometry analysis. Shengcheng Lin collected pathological tissues and analysed the clinical data. Liuqing Wu and Yubiao Gao performed part of the in vitro experiments. Wei Ma performed part of the in vivo experiments. Jun Dong provided the technical support. Xiaofei Yang and Furong Li supervised the project.

State 'Not applicable' if there are no new authors.

**Section 6: Declaration of agreement. All authors, unchanged, new and removed must sign this declaration.**

(NB: Please print the form, (docu)-sign and return/upload a scanned copy. Please note that signatures that have been inserted as an image file are acceptable as long as it is handwritten. Typed names in the signature box are unacceptable.) \* Please delete as appropriate. Delete all of the bold if you were on the original authorship list and are remaining as an author.

|                         | First name | Family name |                                                                                                            | Signature        | Date     |
|-------------------------|------------|-------------|------------------------------------------------------------------------------------------------------------|------------------|----------|
| 11 <sup>th</sup> author | Furong     | Li(CA)      | I agree to the proposed new authorship shown in section 4 /and the proposed change in corresponding author | <i>Furong Li</i> | 2021.5.4 |
|                         |            |             |                                                                                                            |                  |          |
|                         |            |             |                                                                                                            |                  |          |
|                         |            |             |                                                                                                            |                  |          |
|                         |            |             |                                                                                                            |                  |          |
|                         |            |             |                                                                                                            |                  |          |
|                         |            |             |                                                                                                            |                  |          |
|                         |            |             |                                                                                                            |                  |          |



|  | First name | Family name |  | Signature | Date |
|--|------------|-------------|--|-----------|------|
|  |            |             |  |           |      |
|  |            |             |  |           |      |
|  |            |             |  |           |      |

Please use an additional sheet if there are more than 10 authors.

**In case of author collaborations with formal agreement:**

|                                | Name of consortium/consortia | First name | Family name |                                                                                                            | Signature      | Date |
|--------------------------------|------------------------------|------------|-------------|------------------------------------------------------------------------------------------------------------|----------------|------|
| Representative/legal guarantor | Not applicable               |            |             | I agree to the proposed new authorship shown in section 4 /and the proposed change in corresponding author | Not applicable |      |

Both added/removed authors should complete the information in the first table under Section 6.

---- End of form ----
